# Supplementary material for: Mechanistic features of the atypical tRNA m1G9 SPOUT methyltransferase, Trm10
Source: PubMed Central journal article supplement — Nucleic Acids Res. 2017 Jul 21;45(15):9019–29. doi: 10.1093/nar/gkx620 (PMC5587797; doi:10.1093/nar/gkx620), 2017-07-21

*Supplementary Material for:*

**Mechanistic features of the atypical tRNA<sup>m<sup>1</sup>G<sub>9</sub></sup> SPOUT methyltransferase, Trm10**

Aiswarya Krishnamohan and Jane E. Jackman

**Supplementary Figure Legends**

**Figure S1: Purified Trm10 proteins.** SDS-PAGE of purified yeast and human Trm10 wild type and mutant proteins. Expected molecular weights for the N-terminal His<sub>6</sub>-tagged enzymes: ScTrm10, 36.8 kDa; hTRMT10A, 42.0 kDa. MW – Molecular weight standards; WT – wild-type; DM – D210A + D100N ScTrm10 double mutant; TM – D210A + D100N + E111A ScTrm10 triple mutant.

**Figure S2: SAM-dependence of Trm10 enzymes.** tRNA<sup>Gly</sup> m<sup>1</sup>G<sub>9</sub> methylation activity of ScTrm10 (**A**) and hTRMT10A (**B**) with varying concentrations of SAM (10 – 500 μM for WT, D210N and G206A G207A enzymes and 0.005 – 500 μM for all other variants). Nucleotides corresponding to reaction product (p\*m<sup>1</sup>G) and unreacted substrate (p\*G) are indicated to the left of each assay panel.

**Figure S3: SAM binding by human TRMT10A.** Isothermal titration calorimetry (ITC) was used to measure the  $K_{D,SAM}$  exhibited by hTRMT10A (WT and variants, as indicated). The top panels show raw injection traces (with heat expressed as differential power) and the bottom panels show the corresponding binding isotherms calculated from the integrated injection heats normalized per mole of injectant SAM.

**Figure S4: Double mutant cycle analysis.** A calculation of the theoretical  $k_{obs}$  for the D210A+D100N double mutant (DM) was performed using an additive assumption in which the change in free energy of the transition state associated with the double mutation is equal to the sum of the changes in free energy associated with the single mutations ( $\Delta\Delta G^{\ddagger}_{int} = 0$ ). The measured rate constants ( $k_{obs}$ ) for wild-

type and each of the single variants (Table 1) was used to calculate the  $k_{\text{obs}}$  for the DM (shown in italics) according to the equations relating activation energy to the ratio of the relevant rate constants, yielding a theoretical value of  $0.11 \text{ min}^{-1}$ .

**Figure S5: Binding to tRNA<sup>Gly</sup> by Trm10 single residue variants. (A)** Binding assay with ScTrm10 enzymes measured by FA to calculate  $K_{\text{D,tRNA}}$  for D210K (red), D100N (green) and E111A (blue) variant enzymes. Black triangles correspond to BSA control used in the same FA assay. Fits shown correspond to the best fit to the binding isotherm (eq. 4). **(B)** Binding assay with hTRMT10A enzymes measured by FA to calculate  $K_{\text{D,tRNA}}$  for WT (brown) and D210N (purple) enzymes. Fits shown correspond to the best fit to the binding isotherm (eq. 4).

**Figure S1**

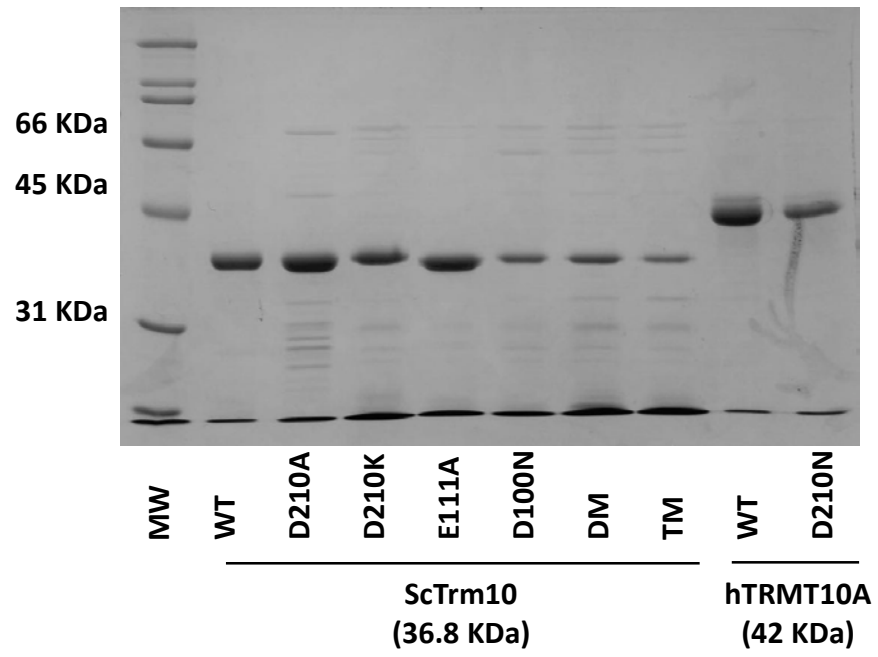

Figure S2

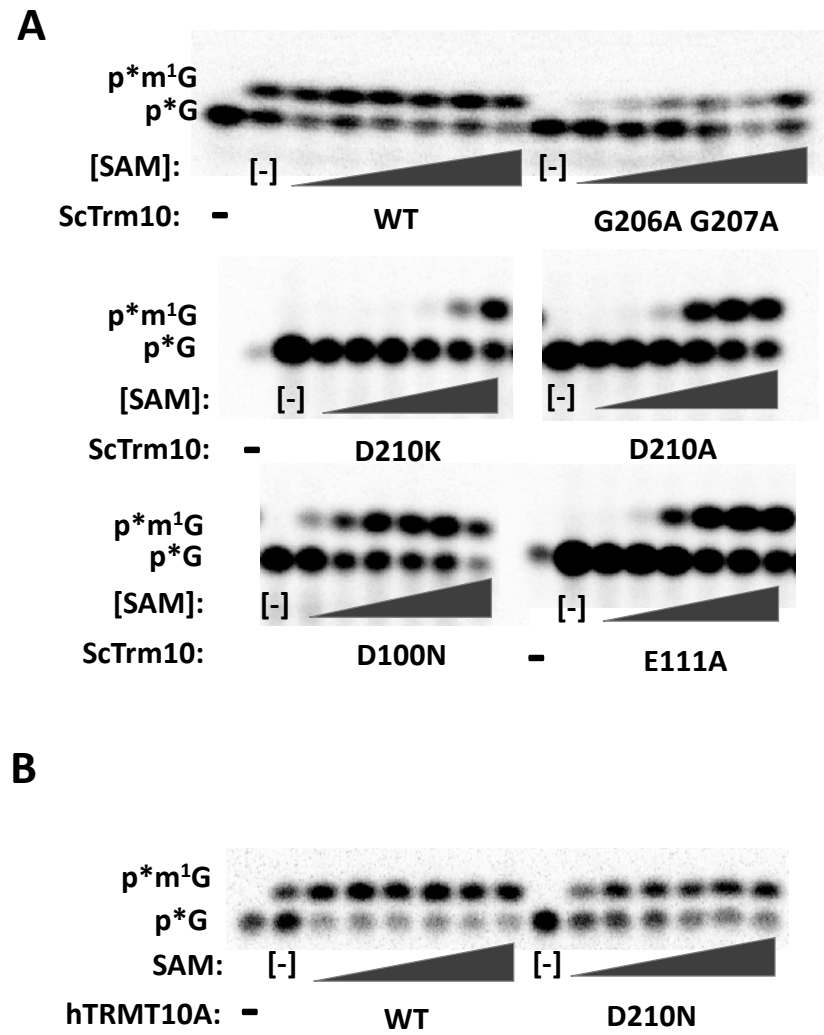

Figure S3

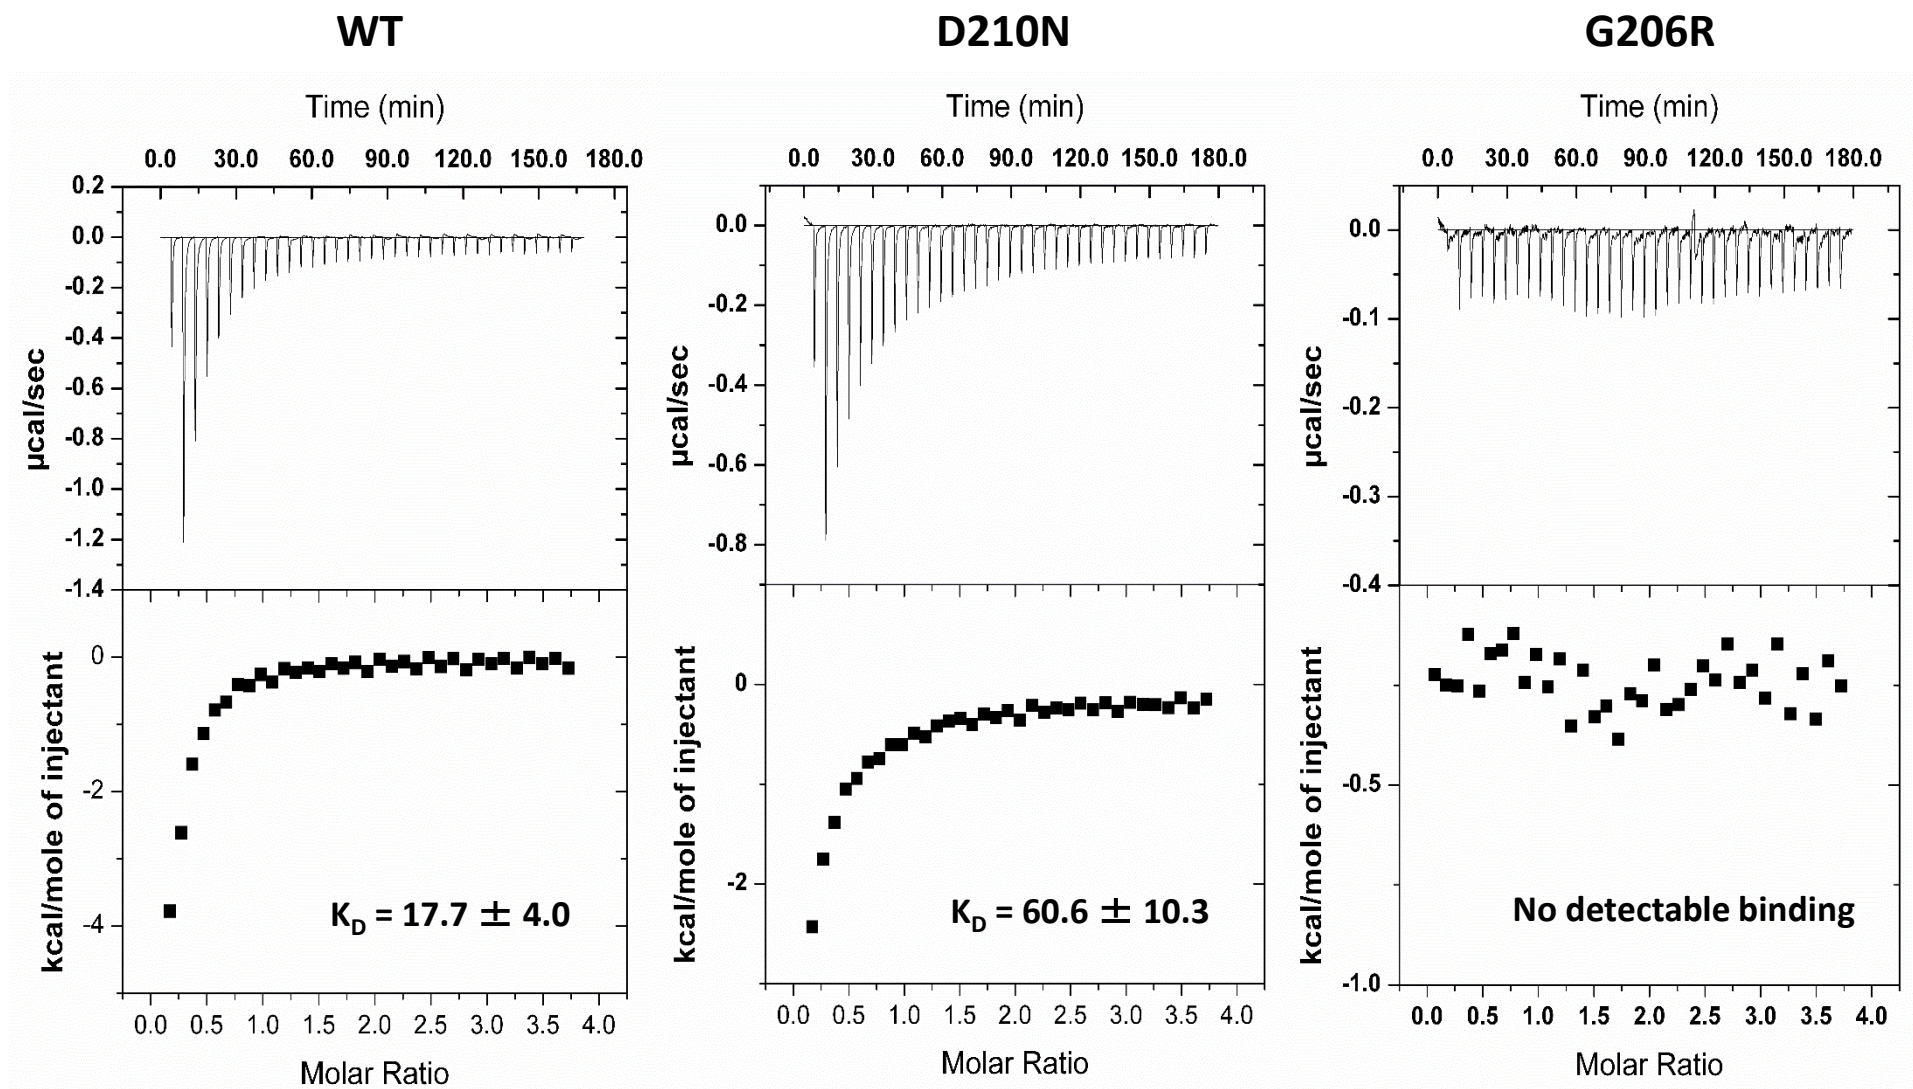

Figure S4

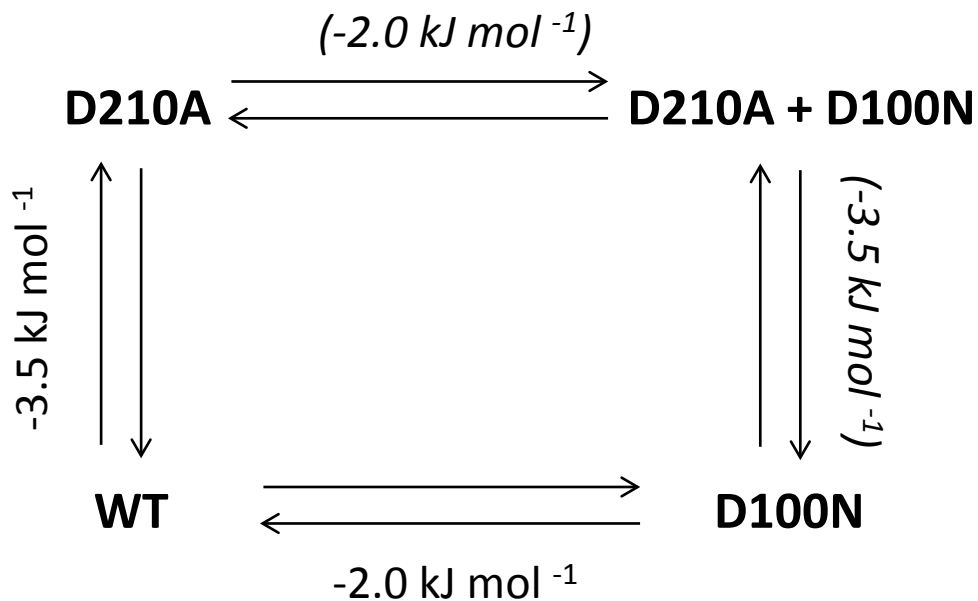

$\Delta\Delta G_{\text{int}}^{\ddagger} = 0$  (if independent effects on transition state)

Therefore:  $\Delta G_{\text{WT} \rightarrow \text{D210A}}^{\ddagger} = \Delta G_{\text{D100N} \rightarrow \text{D210A} + \text{D100N}}^{\ddagger}$

$$\Delta G_{\text{WT} \rightarrow \text{D210A}}^{\ddagger} = -RT \ln(k_{\text{obs D210A}}/k_{\text{obs WT}})$$

$$\Delta G_{\text{D100N} \rightarrow \text{D210A} + \text{D100N}}^{\ddagger} = -RT \ln(k_{\text{obs D210A} + \text{D100N}}/k_{\text{obs D100N}})$$

Theoretical  $k_{\text{obs D210A} + \text{D100N}} = 0.24 * 0.44 / 1.00 = 0.11 \text{ min}^{-1}$

Figure S5

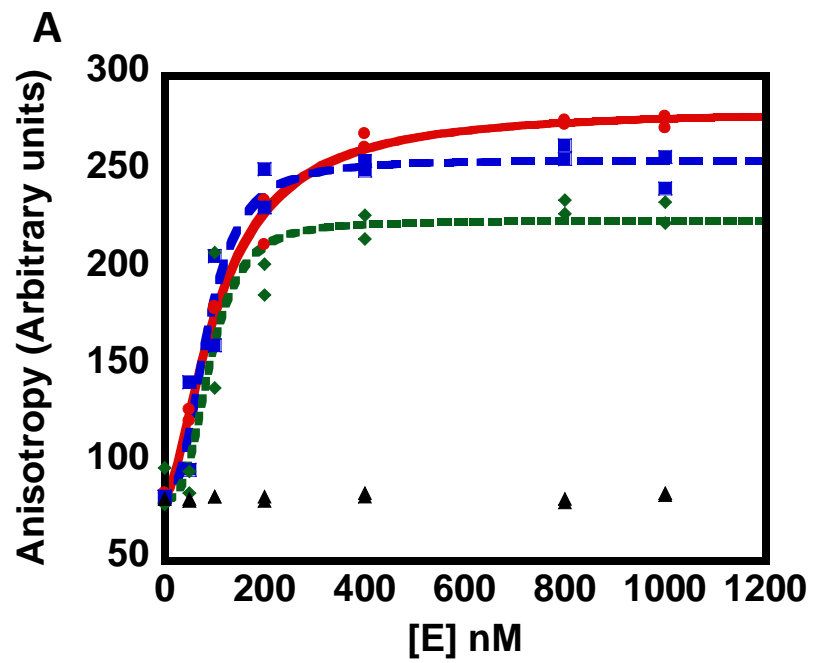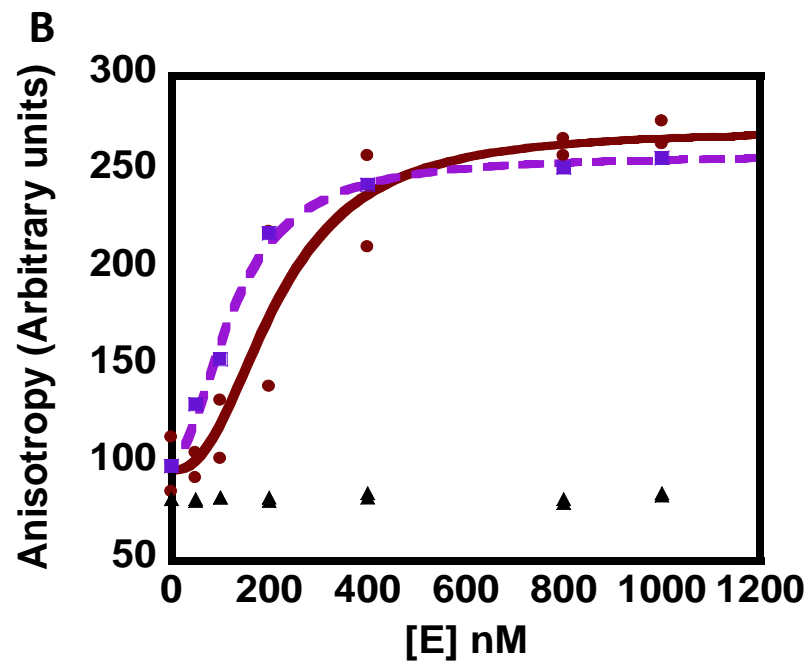

Supplement: gkx620_Supp.pdf [file gkx620_Supp.pdf]
